# Supplementary material
Source: PubMed Central journal article supplement (PMC8970611)

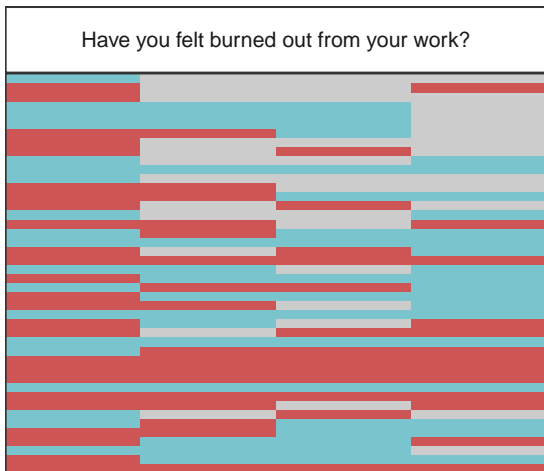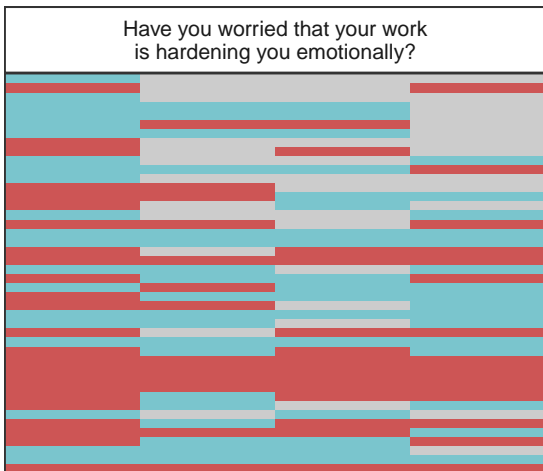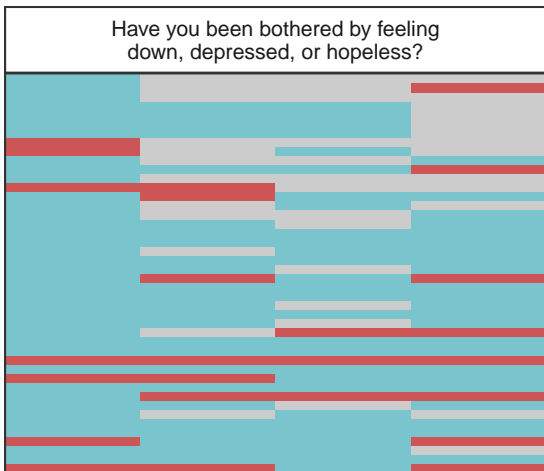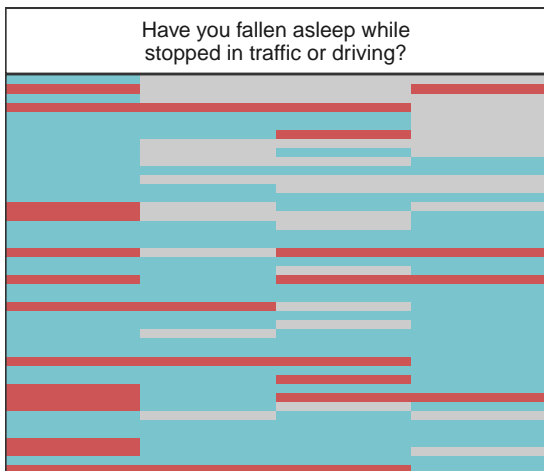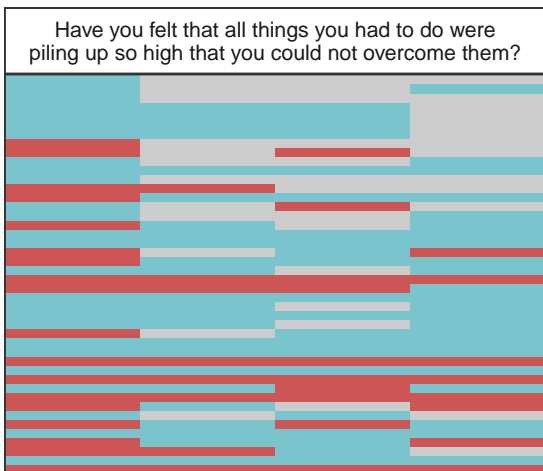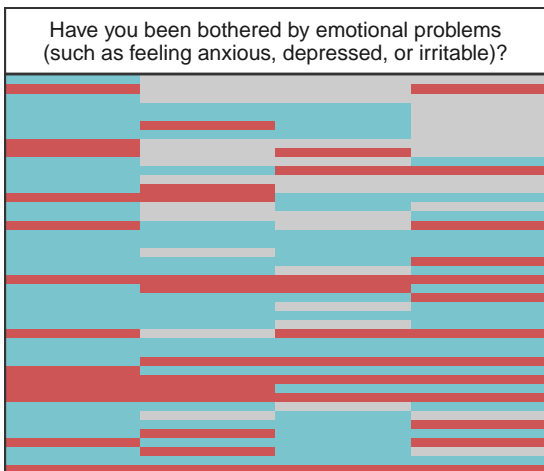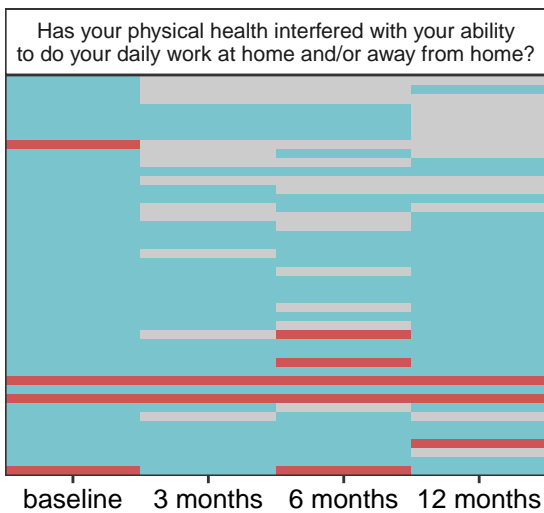

baseline 3 months 6 months 12 months

baseline 3 months 6 months 12 months

Response

- No
- Yes
- Missing

Time

Supplement: mmc1.pdf [file mmc1.pdf]

Subject

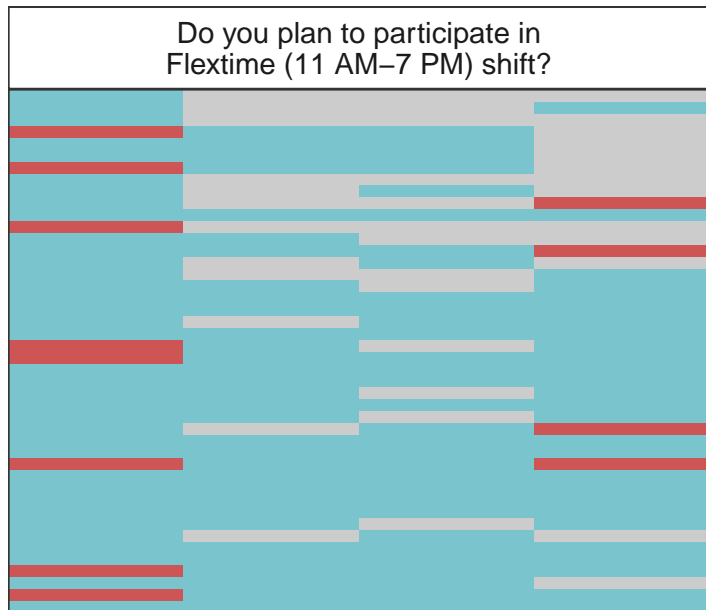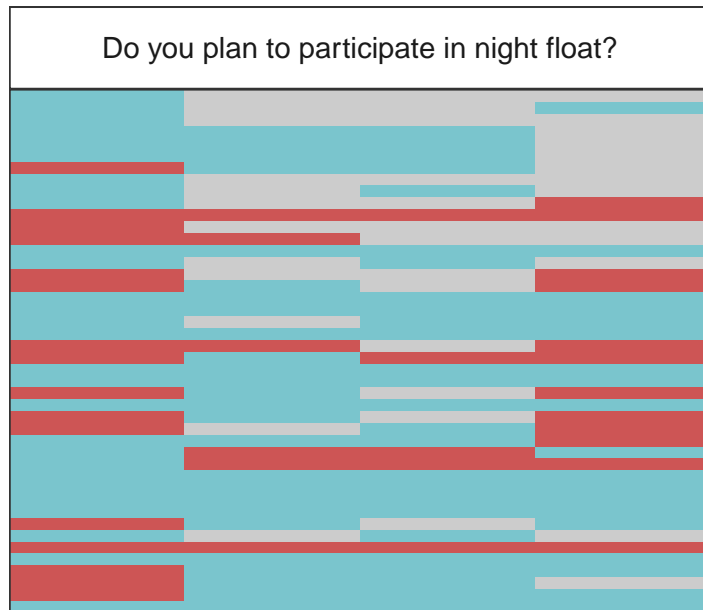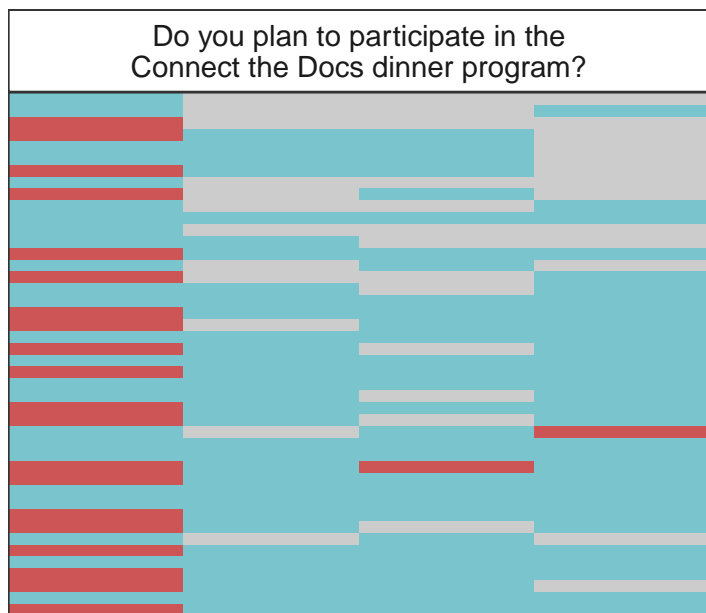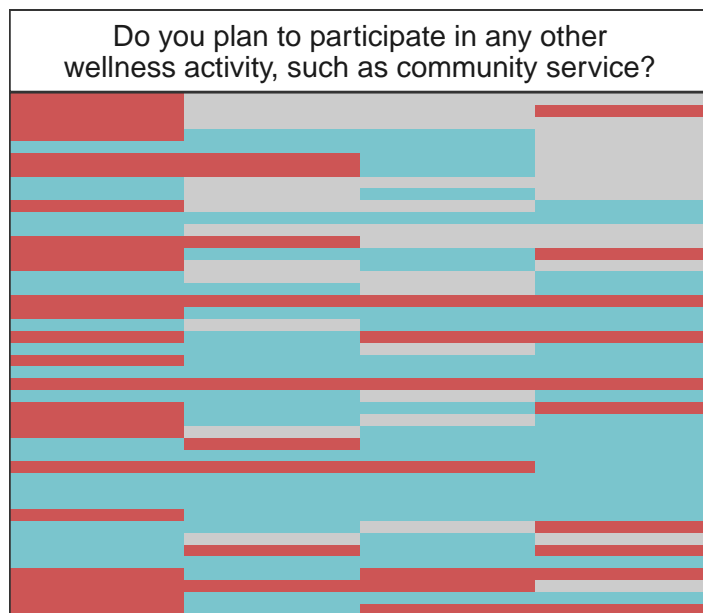

Response

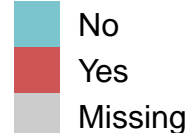

baseline 3 months 6 months 12 months

Time

baseline 3 months 6 months 12 months

Supplement: mmc2.pdf [file mmc2.pdf]
